# Supplementary material for: Epidemiology of Distal Radius Fractures in Children and Adults During the&nbsp;COVID-19 Pandemic – A Two-Center Study
Source: Research Square preprint supplement (doi:10.21203/rs.3.rs-132986/v1), 2020-12-31
Supplement: Supplementary file 1 [file a50d03a6226468eabb3234e9.xls]

## Sheet: Arkusz1
Table 1: epidemiological characteristics of patients with distal radius fracture
Variable	2020 (pandemic)	2019 (no pandemic)	the difference between 2020 and 2019	P
total number of patients	180	212	-0.151	0.44816
number of children (<18 years of age)	77	80	-0.038	0.31
number of adults (> 18 years of age)	103	132	-0.22	0,01253*
the number of children treated conservatively	64	69	-0.072	0.37679
the number of adults treated conservatively	83	119	-0.303	0,03618*
number of children treated surgically	13	11	0.182	0.37679
% of children treated with surgery	16.9	13.8	0.225
number of adults treated surgically	20	13	0.538	0,03618*
% of adults treated with surgery	19.4	9.8	0.98
number of adults treated surgically - volar plate	11	4	2.75
number of adults treated surgically - Kirschner wires	9	9	0	0.78903
mean age of all patients	37 years, 2 months	40 years, 1 month	-0.072	0.293293
mean age of adult patients	57 years, 9 months	58 years	-0.002	0.94019
mean age of childhood patients	9 years, 8 months	10 years, 6 months	-0.075	0.119456
average length of hospitalization in case of adult surgery [days]	2.55	2.92	-0.127	0.40053
average length of hospitalization in case of surgical treatment of children [days]	3.38	3.82	-0.115	0,03857*
the ratio of men to women	1.5	0.72	2.083	0.62895
* p < 0,05
